# Supplementary material for: Analysis of Phenolic Acids and Flavonoids in Rabbiteye Blueberry Leaves by UPLC-MS/MS and Preparation of Nanoemulsions and Extracts for Improving Antiaging Effects in Mice
Source: MDPI journal article supplement (doi:10.3390/foods12101942), 2023-05-10
Supplement: s1 [file s1]

Supplementary Material

for

**Analysis of Phenolic Acids and Flavonoids in Rabbiteye Blueberry  
Leaves by UPLC-MS/MS and Preparation of Nanoemulsions and  
Extracts for Improving Antiaging Effects in Mice**

**Hsin-Rong Yu<sup>1</sup> and Bing-Huei Chen<sup>1,2,\*</sup>**

<sup>1</sup> Department of Food Science, Fu Jen Catholic University, New Taipei City 242062, Taiwan

<sup>2</sup> Department of Nutrition, China Medical University, Taichung 40402, Taiwan

\* Correspondence: 002622@mail.fju.edu.tw, Telephone: 886-2-29053626.

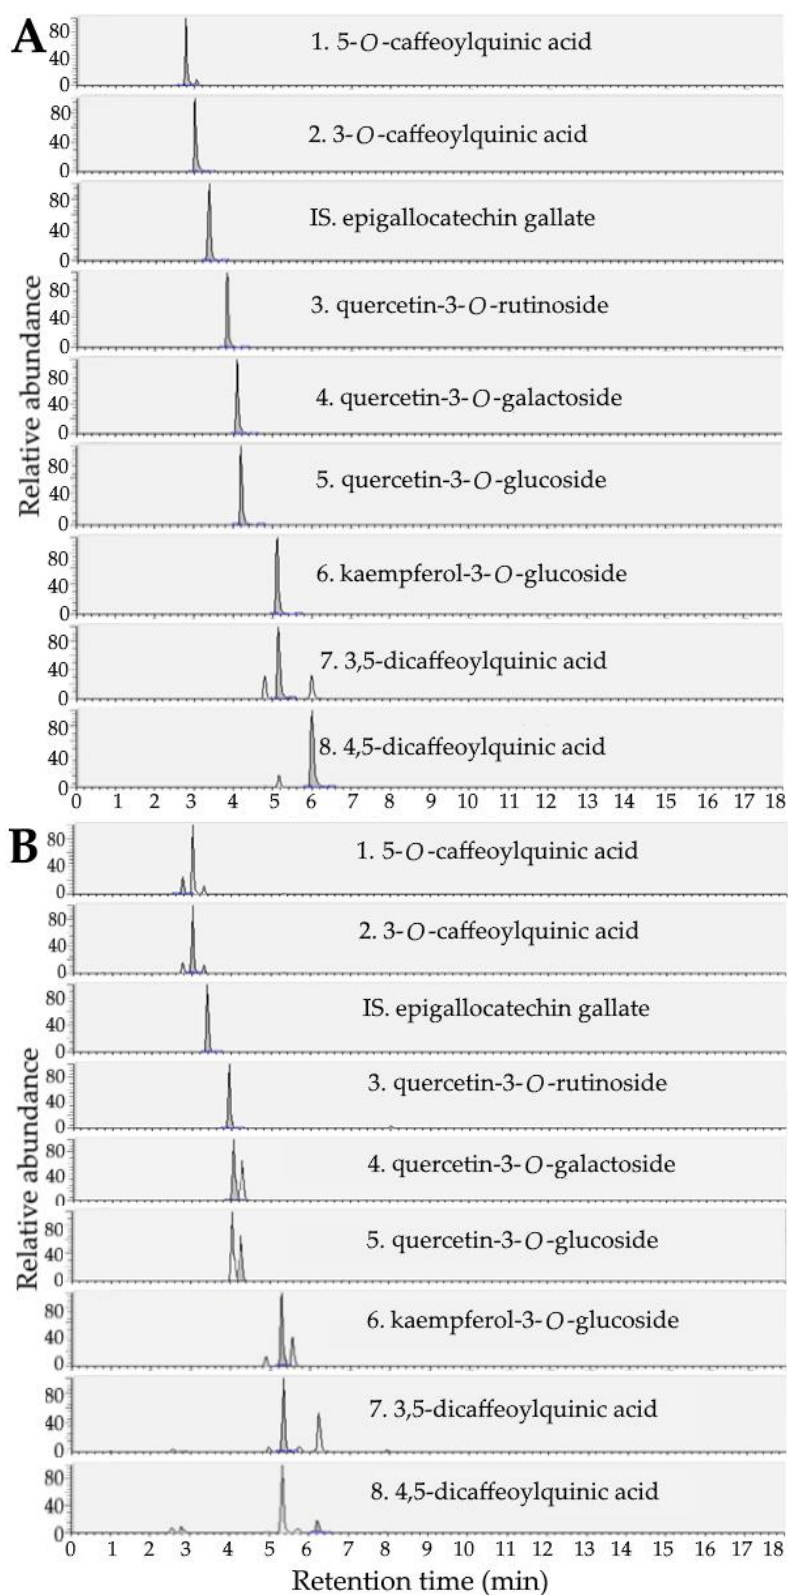

**Figure S1.** UPLC-MS/MS chromatograms of phenolic acid and flavonoid standards (A) and rabbiteye blueberry leaf extract (B) as well as internal standard EGCG as detected by SRM mode.

**Table S1.** Linear regression equation and coefficient of determination of phenolic acid and flavonoid compounds in rabbiteye blueberry leaves as determined by UPLC-MS/MS.

| Compounds                          | LOD (ng/mL) <sup>a</sup> | LOQ (ng/mL) <sup>b</sup> | Linear regression equation | R <sup>2</sup> <sup>c</sup> |
|------------------------------------|--------------------------|--------------------------|----------------------------|-----------------------------|
| 3- <i>O</i> -caffeoylquinic acid   | 0.645                    | 1.954                    | y=2500957x+2260            | 0.9901                      |
| 5- <i>O</i> -caffeoylquinic acid   | 0.431                    | 1.306                    | y=4387038x-508             | 0.9955                      |
| 3,5-dicaffeoylquinic acid          | 0.373                    | 1.130                    | y=3398226x+48              | 0.9967                      |
| 4,5-dicaffeoylquinic acid          | 0.430                    | 1.304                    | y=4895063x-384             | 0.9956                      |
| quercetin-3- <i>O</i> -galactoside | 0.773                    | 2.344                    | y=10856394x+744            | 0.9858                      |
| quercetin-3- <i>O</i> -glucoside   | 0.839                    | 2.542                    | y=7523880x-1507            | 0.9833                      |
| quercetin-3- <i>O</i> -rutinoside  | 0.440                    | 1.333                    | y=10931313x-1107           | 0.9954                      |
| kaempferol-3- <i>O</i> -glucoside  | 0.372                    | 1.128                    | y=12192000x-2938           | 0.9967                      |

<sup>a</sup>Limit of detection

<sup>b</sup>Limit of quantitation

<sup>c</sup>Coefficient of determination

**Table S2.** Quality control data of phenolic acid and flavonoid compounds in rabbiteye blueberry leaves as determined by UPLC-MS/MS.

| Compounds                          | Intra-day variability <sup>a</sup> |                      | Inter-day variability <sup>a</sup> |                      |
|------------------------------------|------------------------------------|----------------------|------------------------------------|----------------------|
|                                    | Mean ± SD (µg/g)                   | RSD (%) <sup>b</sup> | Mean ± SD (µg/g)                   | RSD (%) <sup>b</sup> |
| 5- <i>O</i> -caffeoylquinic acid   | 822.59 ± 25.48                     | 3.10                 | 815.83 ± 18.75                     | 2.30                 |
| 3- <i>O</i> -caffeoylquinic acid   | 6519.64 ± 74.01                    | 1.14                 | 6479.53 ± 117.99                   | 1.82                 |
| quercetin-3- <i>O</i> -rutinoside  | 1044.11 ± 14.06                    | 1.35                 | 1038.45 ± 16.70                    | 1.61                 |
| quercetin-3- <i>O</i> -galactoside | 2001.05 ± 86.88                    | 4.34                 | 1950.76 ± 123.43                   | 6.33                 |
| quercetin-3- <i>O</i> -glucoside   | 805.12 ± 20.90                     | 2.60                 | 910.42 ± 20.48                     | 2.25                 |
| kaempferol-3- <i>O</i> -glucoside  | 324.59 ± 15.68                     | 4.83                 | 322.78 ± 12.63                     | 3.91                 |
| 3,5-dicaffeoylquinic acid          | 202.45 ± 9.59                      | 4.73                 | 194.50 ± 9.36                      | 4.81                 |
| 4,5-dicaffeoylquinic acid          | 66.09 ± 2.58                       | 3.90                 | 61.15 ± 2.99                       | 4.88                 |

<sup>a</sup>Mean of triplicate analyses ± standard deviation.

<sup>b</sup>Relative standard deviation (%) = (standard deviation/mean) × 100.

**Table S3.** Recovery of phenolic acid and flavonoid compounds in rabbiteye blueberry leaves by UPLC-MS/MS.

| Compound                           | Original<br>( $\mu\text{g}$ ) <sup>a</sup> | Spiked<br>( $\mu\text{g}$ ) <sup>b</sup> | Found<br>( $\mu\text{g}$ ) <sup>c</sup> | Recovery<br>(%) <sup>d</sup> | Mean $\pm$ SD<br>(%) | RSD<br>(%) <sup>e</sup> |
|------------------------------------|--------------------------------------------|------------------------------------------|-----------------------------------------|------------------------------|----------------------|-------------------------|
| 3- <i>O</i> -caffeoylquinic acid   | 3180.22                                    | 350                                      | 3615.30                                 | 102.41                       | 102.61 $\pm$ 6.20    | 6.05                    |
|                                    |                                            | 3500                                     | 6867.93                                 | 102.81                       |                      |                         |
| 5- <i>O</i> -caffeoylquinic acid   | 444.86                                     | 45                                       | 453.02                                  | 92.48                        | 92.92 $\pm$ 4.77     | 5.13                    |
|                                    |                                            | 450                                      | 836.16                                  | 93.44                        |                      |                         |
| 3,5-dicaffeoylquinic acid          | 104.74                                     | 10.5                                     | 108.44                                  | 94.10                        | 95.01 $\pm$ 6.26     | 6.59                    |
|                                    |                                            | 105                                      | 201.20                                  | 95.93                        |                      |                         |
| 4,5-dicaffeoylquinic acid          | 33.37                                      | 3.5                                      | 35.80                                   | 97.10                        | 95.80 $\pm$ 6.83     | 7.13                    |
|                                    |                                            | 35                                       | 64.62                                   | 94.51                        |                      |                         |
| quercetin-3- <i>O</i> -galactoside | 1019.57                                    | 110                                      | 1107.20                                 | 98.02                        | 102.65 $\pm$ 6.53    | 6.36                    |
|                                    |                                            | 1100                                     | 2273.66                                 | 107.27                       |                      |                         |
| quercetin-3- <i>O</i> -glucoside   | 424.42                                     | 42.5                                     | 437.36                                  | 93.67                        | 90.50 $\pm$ 3.94     | 4.35                    |
|                                    |                                            | 425                                      | 741.80                                  | 87.33                        |                      |                         |
| quercetin-3- <i>O</i> -rutinoside  | 521.83                                     | 55                                       | 576.37                                  | 99.92                        | 98.12 $\pm$ 5.27     | 5.37                    |
|                                    |                                            | 550                                      | 1032.49                                 | 96.33                        |                      |                         |
| kaempferol-3- <i>O</i> -glucoside  | 177.95                                     | 17.5                                     | 177.82                                  | 90.98                        | 90.37 $\pm$ 6.24     | 6.90                    |
|                                    |                                            | 175                                      | 316.81                                  | 89.76                        |                      |                         |

<sup>a</sup>Amount of each phenolic acid/flavonoid compound present originally in 0.5 g of rabbiteye blueberry leaf powder.

<sup>b</sup>Amount of each phenolic acid/flavonoid standard spiked into 0.5 g of rabbiteye blueberry leaf powder.

<sup>c</sup>Amount of each phenolic acid/flavonoid compound extracted and analyzed by UPLC-MS/MS from 0.5 g of rabbiteye blueberry leaf powder containing original content plus spiked standard.

<sup>d</sup>Recovery (%) = (amount of standard found - original amount in sample) / amount of standard spiked  $\times$  100.

<sup>e</sup>Relative standard deviation (%) = (standard deviation/mean)  $\times$  100.
